# Supplementary material
Source: ML conference proceedings conference paper supplement (https://proceedings.neurips.cc/paper_files/paper/2017/hash/c86a7ee3d8ef0b551ed58e354a836f2b-Abstract.html)
Supplement: Supplementary file [file c86a7ee3d8ef0b551ed58e354a836f2b-Supplemental.zip]

## Supplementary Materials

### A Proof for the Adversarial Ordinal Regression Loss (Theorem 1)

Before proving Theorem 1, we review the game matrix  $\mathbf{L}'_{\mathbf{x}_i, \mathbf{w}}$  for ordinal regression problems. Below is the matrix when the number of classes is four:

$$\mathbf{L}'_{\mathbf{x}_i, \mathbf{w}} = \begin{bmatrix} f_1 - f_{y_i} & f_2 - f_{y_i} + 1 & f_3 - f_{y_i} + 2 & f_4 - f_{y_i} + 3 \\ f_1 - f_{y_i} + 1 & f_2 - f_{y_i} & f_3 - f_{y_i} + 1 & f_4 - f_{y_i} + 2 \\ f_1 - f_{y_i} + 2 & f_2 - f_{y_i} + 1 & f_3 - f_{y_i} & f_4 - f_{y_i} + 1 \\ f_1 - f_{y_i} + 3 & f_2 - f_{y_i} + 2 & f_3 - f_{y_i} + 1 & f_4 - f_{y_i} \end{bmatrix} \quad (11)$$

$$= \begin{bmatrix} f_1 & f_2 + 1 & f_3 + 2 & f_4 + 3 \\ f_1 + 1 & f_2 & f_3 + 1 & f_4 + 2 \\ f_1 + 2 & f_2 + 1 & f_3 & f_4 + 1 \\ f_1 + 3 & f_2 + 2 & f_3 + 1 & f_4 \end{bmatrix} - f_{y_i} \quad (12)$$

$$= \mathbf{L}''_{\mathbf{x}_i, \mathbf{w}} - f_{y_i}. \quad (13)$$

**Theorem 1.** An adversarial ordinal regression predictor is obtained by choosing parameters  $\mathbf{w}$  that minimize the empirical risk of the surrogate loss function:

$$AL_{\mathbf{w}}^{\text{ord}}(\mathbf{x}_i, y_i) = \max_{j, l \in \{1, \dots, |\mathcal{Y}|\}} \frac{f_j + f_l + j - l}{2} - f_{y_i} = \max_j \frac{f_j + j}{2} + \max_l \frac{f_l - l}{2} - f_{y_i}, \quad (14)$$

where  $f_j = \mathbf{w} \cdot \phi(\mathbf{x}_i, j)$  for all  $j \in \{1, \dots, |\mathcal{Y}|\}$ .

*Proof.* Our proof strategy is to use the inequalities implied by the definition of  $AL_{\mathbf{w}}^{\text{ord}}$  and then show that the value of  $AL_{\mathbf{w}}^{\text{ord}}$  is equal to the game value of sub-matrices of  $\mathbf{L}'_{\mathbf{x}_i, \mathbf{w}}$ . We start by showing the equality for a small 2 by 2 sub-matrix and build up until we show that the value of  $AL_{\mathbf{w}}^{\text{ord}}$  is indeed equal to the game value of the whole game matrix  $\mathbf{L}'_{\mathbf{x}_i, \mathbf{w}}$ . Empirically minimizing  $AL_{\mathbf{w}}^{\text{ord}}$  will conclude the theorem.

Let us begin the proof by denoting  $v(\mathbf{G})$  as the Nash equilibrium value of a game characterized by game matrix  $\mathbf{G}$ . We would like to prove that for a zero-sum game characterized by  $\mathbf{L}'_{\mathbf{x}_i, \mathbf{w}}$  as described in Eq. (3),  $v(\mathbf{L}'_{\mathbf{x}_i, \mathbf{w}}) = \max_{j, l \in \{1, \dots, |\mathcal{Y}|\}} \frac{f_j + f_l + j - l}{2} - f_{y_i}$ .

Note that for any game matrix  $\mathbf{G}$  and any constant  $c$ ,  $v(\mathbf{G} + c) = v(\mathbf{G}) + c$ . We denote  $\mathbf{L}''_{\mathbf{x}_i, \mathbf{w}} = \mathbf{L}'_{\mathbf{x}_i, \mathbf{w}} + f_{y_i}$ . Thus, proving the theorem is equivalent to proving  $v(\mathbf{L}''_{\mathbf{x}_i, \mathbf{w}}) = \max_{j, l \in \{1, \dots, |\mathcal{Y}|\}} \frac{f_j + f_l + j - l}{2}$ . The matrix  $\mathbf{L}''_{\mathbf{x}_i, \mathbf{w}}$  is similar to the matrix in Eq. (3), but without including the  $-f_{y_i}$  term in each its cells, i.e.,

$$\mathbf{L}''_{\mathbf{x}_i, \mathbf{w}} = \begin{bmatrix} f_1 & f_2 + 1 & \cdots & f_{|\mathcal{Y}|-1} + |\mathcal{Y}| - 2 & f_{|\mathcal{Y}|} + |\mathcal{Y}| - 1 \\ f_1 + 1 & f_2 & \cdots & f_{|\mathcal{Y}|-1} + |\mathcal{Y}| - 3 & f_{|\mathcal{Y}|} + |\mathcal{Y}| - 2 \\ \vdots & \vdots & \ddots & \vdots & \vdots \\ f_1 + |\mathcal{Y}| - 2 & f_2 + |\mathcal{Y}| - 3 & \cdots & f_{|\mathcal{Y}|-1} & f_{|\mathcal{Y}|} + 1 \\ f_1 + |\mathcal{Y}| - 1 & f_2 + |\mathcal{Y}| - 2 & \cdots & f_{|\mathcal{Y}|-1} + 1 & f_{|\mathcal{Y}|} \end{bmatrix}. \quad (15)$$

Let  $j^*$  and  $l^*$  be the solution of  $\arg\max_{j, l \in \{1, \dots, |\mathcal{Y}|\}} \frac{f_j + f_l + j - l}{2}$  (if there are ties, pick any of them) and let  $u^* = \max_{j, l \in \{1, \dots, |\mathcal{Y}|\}} \frac{f_j + f_l + j - l}{2} = \frac{f_{j^*} + f_{l^*} + j^* - l^*}{2}$ . We know the following inequalities hold:

$$f_{j^*} + f_{l^*} + j^* - l^* \geq f_j + f_l + j - l, \quad \forall j, l \in \{1, \dots, |\mathcal{Y}|\} \quad (16)$$

$$f_{j^*} + j^* \geq f_j + j, \quad \forall j \in \{1, \dots, |\mathcal{Y}|\} \quad (17)$$

$$f_{l^*} - l^* \geq f_l - l, \quad \forall l \in \{1, \dots, |\mathcal{Y}|\}. \quad (18)$$

We also know that  $j^* \geq l^*$ ; otherwise, we could just swap them to obtain a larger value.

We first focus on the cases where  $j^* \neq l^*$ . We analyze three different games that are characterized by subsets of matrix  $\mathbf{L}''_{\mathbf{x}_i, \mathbf{w}}$  and show that the value of those games is  $u^*$ .

**Case 1:** Let  $\mathbf{G}_1$  be a game characterized by a 2 by 2 matrix with values that are taken from rows and columns  $j^*$  and  $l^*$  of matrix  $\mathbf{L}_{\mathbf{x}_i, \mathbf{w}}''$ , i.e.,

$$\mathbf{G}_1 = \begin{bmatrix} f_{l^*} & f_{j^*} + j^* - l^* \\ f_{l^*} + j^* - l^* & f_{j^*} \end{bmatrix}. \quad (19)$$

We will show that  $v(\mathbf{G}_1) = u^*$ . Let  $\mathbf{p}$  be the vector of adversary's mixed strategy, then finding  $v(\mathbf{G}_1)$  is equivalent with solving the following optimization:

$$\begin{aligned} & \max V \\ \text{s.t. } & V \leq p_{l^*} f_{l^*} + p_{j^*} (f_{j^*} + j^* - l^*) = p_{l^*} f_{l^*} + p_{j^*} f_{j^*} + p_{j^*} (j^* - l^*) \\ & V \leq p_{l^*} (f_{l^*} + j^* - l^*) + p_{j^*} f_{j^*} = p_{l^*} f_{l^*} + p_{j^*} f_{j^*} + p_{l^*} (j^* - l^*). \end{aligned} \quad (20)$$

We now analyze the optimization above. Let  $p_{l^*} = 0.5 - \alpha$  and  $p_{j^*} = 0.5 + \alpha$  for some  $\alpha$  where  $-0.5 \leq \alpha \leq 0.5$ . The optimization above become:

$$\begin{aligned} & \max V \\ \text{s.t. } & V \leq (0.5 - \alpha) f_{l^*} + (0.5 + \alpha) f_{j^*} + (0.5 + \alpha) (j^* - l^*) \\ & \quad = 0.5 (f_{l^*} + f_{j^*} + j^* - l^*) + \alpha [(f_{j^*} - f_{l^*}) + (j^* - l^*)] \\ & V \leq (0.5 - \alpha) f_{l^*} + (0.5 + \alpha) f_{j^*} + (0.5 - \alpha) (j^* - l^*) \\ & \quad = 0.5 (f_{l^*} + f_{j^*} + j^* - l^*) + \alpha [(f_{j^*} - f_{l^*}) - (j^* - l^*)]. \end{aligned} \quad (21)$$

Since  $j^* \neq l^*$ , based on Eq. (16), we know that:

$$f_{j^*} + f_{l^*} + j^* - l^* \geq f_{j^*} + f_{j^*} + j^* - j^* \Leftrightarrow (f_{j^*} - f_{l^*}) - (j^* - l^*) \leq 0, \quad (22)$$

$$f_{j^*} + f_{l^*} + j^* - l^* \geq f_{l^*} + f_{l^*} + l^* - l^* \Leftrightarrow (f_{j^*} - f_{l^*}) + (j^* - l^*) \geq 0. \quad (23)$$

Therefore, the optimal solution is to set  $\alpha = 0$ , since setting nonzero  $\alpha$  will decrease the right-hand side of one of the constraints and hence decrease the value of  $V$ . Thus, the solution is achieved when we set  $p_{l^*} = p_{j^*} = 0.5$ , which results in a game value of  $\frac{f_{j^*} + f_{l^*} + j^* - l^*}{2} = u^*$ .<sup>3</sup>

**Case 2:** Let  $\mathbf{G}_2$  be a game characterized by a  $|\mathcal{Y}|$  by 2 matrix with values that are taken from column  $j^*$  and  $l^*$  of matrix  $\mathbf{L}_{\mathbf{x}_i, \mathbf{w}}''$ , i.e.,

$$\mathbf{G}_2 = \begin{bmatrix} f_{l^*} + l^* - 1 & f_{j^*} + j^* - 1 \\ \vdots & \vdots \\ f_{l^*} & f_{j^*} + j^* - l^* \\ f_{l^*} + 1 & f_{j^*} + j^* - l^* - 1 \\ \vdots & \vdots \\ f_{l^*} + j^* - l^* - 1 & f_{j^*} + 1 \\ f_{l^*} + j^* - l^* & f_{j^*} \\ \vdots & \vdots \\ f_{l^*} + |\mathcal{Y}| - l^* & f_{j^*} + |\mathcal{Y}| - j^* \end{bmatrix}. \quad (24)$$

Finding  $v(\mathbf{G}_2)$  is equivalent to solving a similar optimization to that of Eq (20) with  $|\mathcal{Y}|$  constraints corresponding to each row of matrix  $\mathbf{G}_2$  instead of just two. We can easily see that the solution is achieved if we set  $p_{l^*} = p_{j^*} = 0.5$  as in the previous case. The right hand side of any  $m$ -th constraint  $m < l^*$  or  $m > j^*$  is dominated, i.e., it has value greater than or equal to  $u^*$ , and the right hand side of any  $m$ -th constraint  $l^* < m < j^*$  is equal to  $u^*$ . Assigning other values to  $p_{l^*}$  and  $p_{j^*}$  will decrease the right-hand side of some of the  $m$ -th ( $l^* \leq m \leq j^*$ ) constraints (as explained in case 1), and hence decrease the value of  $V$ . Therefore, we can conclude that  $v(\mathbf{G}_2) = u^*$ .

**Case 3:** Let  $\mathbf{G}_3$  be a game characterized by a  $|\mathcal{Y}|$  by 3 matrix with values that are taken from columns  $j^*$ ,  $l^*$ , and any other column  $m$  in matrix  $\mathbf{L}_{\mathbf{x}_i, \mathbf{w}}''$ . We consider three variations of the game,  $\mathbf{G}_3^1$  where

<sup>3</sup>In this analysis and other analyses in this proof, we omit the analysis for the trivial cases where the terms associated with  $\alpha$  (in the case above:  $(f_{j^*} - f_{l^*}) + (j^* - l^*)$  and  $(f_{j^*} - f_{l^*}) - (j^* - l^*)$ ) are zero. In this case, the value of  $\alpha$  can be anything, but the game value remain the same.

$m < l^*$ ,  $\mathbf{G}_3^2$  where  $l^* < m < j^*$ , and  $\mathbf{G}_3^3$  where  $m > j^*$ . Below is the game matrix for the first variation:

$$\mathbf{G}_3^1 = \begin{bmatrix} \vdots & \vdots & \vdots \\ f_m & f_{l^*} + l^* - m & f_{j^*} + j^* - m \\ \vdots & \vdots & \vdots \\ f_m + l^* - m & f_{l^*} & f_{j^*} + j^* - l^* \\ \vdots & \vdots & \vdots \\ f_m + j^* - m & f_{l^*} + j^* - l^* & f_{j^*} \\ \vdots & \vdots & \vdots \end{bmatrix}. \quad (25)$$

Let us analyze the optimization for finding the game value for  $\mathbf{G}_3^1$ , in particular the  $l^*$ -th and  $j^*$ -th constraints:

$$\begin{aligned} & \max V \\ \text{s.t. } & \vdots \\ & V \leq p_m(f_m + l^* - m) + p_{l^*}f_{l^*} + p_{j^*}(f_{j^*} + j^* - l^*) \\ & V \leq p_m(f_m + j^* - m) + p_{l^*}(f_{l^*} + j^* - l^*) + p_{j^*}f_{j^*} \\ & \vdots \end{aligned} \quad (26)$$

Let us use the notation similar to Case 1. Let  $p_m = \beta$ ,  $p_{l^*} = 0.5 - \alpha - \beta$  and  $p_{j^*} = 0.5 + \alpha$  where  $-0.5 \leq \alpha \leq 0.5$ ;  $0 \leq \beta \leq 1$ ; and  $-0.5 \leq \alpha + \beta \leq 0.5$ . We can write the constraints above as:

$$\begin{aligned} V & \leq 0.5(f_{l^*} + f_{j^*} + j^* - l^*) + \alpha[(f_{j^*} - f_{l^*}) + (j^* - l^*)] + \beta[(f_m - m) - (f_{l^*} - l^*)] \\ V & \leq 0.5(f_{l^*} + f_{j^*} + j^* - l^*) + \alpha[(f_{j^*} - f_{l^*}) - (j^* - l^*)] + \beta[(f_m - m) - (f_{l^*} - l^*)]. \end{aligned}$$

Since  $(f_{j^*} - f_{l^*}) + (j^* - l^*) \geq 0$ ;  $(f_{j^*} - f_{l^*}) - (j^* - l^*) \leq 0$ ; and  $(f_m - m) - (f_{l^*} - l^*) \leq 0$ , the optimal solution is setting  $\alpha = 0$ , and  $\beta = 0$ . Since  $p_m = \beta = 0$ , we leave with the same game matrix as  $\mathbf{G}_2$ . Therefore  $v(\mathbf{G}_3^1) = u^*$ .

For  $\mathbf{G}_3^3$ , we let  $p_m = \beta$ ,  $p_{l^*} = 0.5 - \alpha$  and  $p_{j^*} = 0.5 + \alpha - \beta$  where  $-0.5 \leq \alpha \leq 0.5$ ;  $0 \leq \beta \leq 1$ ; and  $-0.5 \leq \alpha - \beta \leq 0.5$ . Similar to the previous case,  $l^*$ -th and  $j^*$ -th constraints can be written as:

$$\begin{aligned} V & \leq 0.5(f_{l^*} + f_{j^*} + j^* - l^*) + \alpha[(f_{j^*} - f_{l^*}) + (j^* - l^*)] + \beta[(f_m + m) - (f_{j^*} + j^*)] \\ V & \leq 0.5(f_{l^*} + f_{j^*} + j^* - l^*) + \alpha[(f_{j^*} - f_{l^*}) - (j^* - l^*)] + \beta[(f_m + m) - (f_{j^*} + j^*)]. \end{aligned}$$

Due to a similar reason as in the previous case, and  $(f_m + m) - (f_{j^*} + j^*) \leq 0$ , the optimal solution is to set  $\alpha = 0$ , and  $\beta = 0$ , and hence  $v(\mathbf{G}_3^3) = u^*$ .

For  $\mathbf{G}_3^2$ , we will analyze the  $l^*$ -th,  $m$ -th, and  $j^*$ -th constraint. Let  $p_m = \beta$ ,  $p_{l^*} = 0.5 - \alpha$  and  $p_{j^*} = 0.5 + \alpha - \beta$  where  $-0.5 \leq \alpha \leq 0.5$ ;  $0 \leq \beta \leq 1$ ; and  $-0.5 \leq \alpha - \beta \leq 0.5$ . The constraints can be written as:

$$\begin{aligned} V & \leq 0.5(f_{l^*} + f_{j^*} + j^* - l^*) + \alpha[(f_{j^*} - f_{l^*}) + (j^* - l^*)] + \beta[(f_m + m) - (f_{j^*} + j^*)] \\ V & \leq 0.5(f_{l^*} + f_{j^*} + j^* - l^*) + \alpha[f_{j^*} - f_{l^*} + j^* + l^* - 2m] + \beta[(f_m + m) - (f_{j^*} + j^*)] \\ V & \leq 0.5(f_{l^*} + f_{j^*} + j^* - l^*) + \alpha[(f_{j^*} - f_{l^*}) - (j^* - l^*)] + \beta[(f_m - m) - (f_{j^*} - j^*)]. \end{aligned}$$

We know that  $(f_{j^*} - f_{l^*}) + (j^* - l^*) \geq 0$ ;  $(f_{j^*} - f_{l^*}) - (j^* - l^*) \leq 0$  and  $(f_m + m) - (f_{j^*} + j^*) \leq 0$ . If it is the case that  $f_{j^*} - f_{l^*} + j^* + l^* - 2m \leq 0$ , or  $(f_m - m) - (f_{j^*} - j^*) \leq 0$ , or both, it will force both  $\alpha$  and  $\beta$  to be 0. If both of them are positive, we need an additional analysis as the following.

We focus on the  $m$ -th, and  $j^*$ -th constraints. Since we want to check if there is a combination of  $\alpha$  and  $\beta$  values that make the game value greater than  $u^*$ ,  $\alpha$  and  $\beta$  have to satisfy the following:

$$\alpha[f_{j^*} - f_{l^*} + j^* + l^* - 2m] + \beta[(f_m + m) - (f_{j^*} + j^*)] \geq 0 \quad (27)$$

$$\Leftrightarrow \alpha \geq \frac{(f_{j^*} + j^*) - (f_m + m)}{f_{j^*} - f_{l^*} + j^* + l^* - 2m} \beta = \frac{(f_{j^*} + j^*) - (f_m - m) - 2m}{(f_{j^*} + j^*) - (f_{l^*} - l^*) - 2m} \beta \geq \beta, \quad (28)$$

$$\alpha [(f_{j^*} - f_{l^*}) - (j^* - l^*)] + \beta [(f_m - m) - (f_{j^*} - j^*)] \geq 0 \quad (29)$$

$$\Leftrightarrow \beta \geq \frac{(j^* - l^*) - (f_{j^*} - f_{l^*})}{(f_m - m) - (f_{j^*} - j^*)} \alpha = \frac{(f_{l^*} - l^*) - (f_{j^*} - j^*)}{(f_m - m) - (f_{j^*} - j^*)} \alpha \geq \alpha. \quad (30)$$

We know that  $(f_{j^*} + j^*) - (f_m - m) - 2m \geq (f_{j^*} + j^*) - (f_{l^*} - l^*) - 2m$ , and  $(f_{l^*} - l^*) - (f_{j^*} - j^*) \geq (f_m - m) - (f_{j^*} - j^*)$ . If at least one of those inequalities is strict, e.g., the first inequality, it is better to set  $\alpha = \beta = 0$ , since in order to increase the value of RHS of the  $m$ -th constraint  $\alpha$  has to be strictly greater than  $\beta$ , which will decrease the RHS of the  $j^*$ -th constraint and thus decrease the game value. If both are equal, then many solutions exist, i.e.,  $\alpha = \beta$ , but the game value remains the same, i.e.  $u^*$ , since in this case  $\alpha [f_{j^*} - f_{l^*} + j^* + l^* - 2m] + \beta [(f_m + m) - (f_{j^*} + j^*)] = \alpha [(f_{j^*} - f_{l^*}) - (j^* - l^*)] + \beta [(f_m - m) - (f_{j^*} - j^*)] = 0$ . Therefore  $v(\mathbf{G}_3^2) = u^*$ .

Note that we omit the analysis for the trivial cases when the terms associated with  $\alpha$  and  $\beta$  are zero. In those cases, any value of  $\alpha$  and  $\beta$  will satisfy the constraints, but the game value remain the same.

**Conclusion:** We are now ready to analyze the game value for  $\mathbf{L}_{\mathbf{x}_i, \mathbf{w}}''$ . Since adding any column  $m \in \{1, \dots, |\mathcal{Y}|\} \setminus \{l^*, j^*\}$  to  $\mathbf{G}_2$  will not change the game value, then adding the combination of them will not change the game value either. Therefore, we can conclude that  $v(\mathbf{L}_{\mathbf{x}_i, \mathbf{w}}'') = u^*$ .

For the case that  $j^* = l^*$ , we know that  $\max_{j, l \in \{1, \dots, |\mathcal{Y}|\}} \frac{f_j + f_l + j - l}{2} = f_{j^*}$ . It is clear that  $f_{j^*}$  is the solution for the game that is defined by column  $j^*$  from matrix  $\mathbf{L}_{\mathbf{x}_i, \mathbf{w}}''$ . For any other column  $m$ , if we include it in the game, the corresponding  $j^*$ -th constraint become (we let  $p_m = \beta$ , and  $p_{j^*} = 1 - \beta$ ):

$$V \leq f_{j^*} + \beta [(f_m - m) - (f_{j^*} - j^*)] \quad \text{if } m < j^*, \text{ or} \quad (31)$$

$$V \leq f_{j^*} + \beta [(f_m + m) - (f_{j^*} + j^*)] \quad \text{if } m > j^*. \quad (32)$$

Since we know that  $(f_{j^*} - j^*) \geq (f_m - m)$ , and  $(f_{j^*} + j^*) \geq (f_m + m)$ , the optimal solution is to set  $\beta = 0$ , and the game value remain the same. We can also generalize it to all combination of column  $m \in \{1, \dots, |\mathcal{Y}|\} \setminus \{j^*\}$  to show that  $v(\mathbf{L}_{\mathbf{x}_i, \mathbf{w}}'') = f_{j^*} = u^*$ .

Therefore, we can conclude that the value of the game matrix  $v(\mathbf{L}_{\mathbf{x}_i, \mathbf{w}}'') = \max_{j, l \in \{1, \dots, |\mathcal{Y}|\}} \frac{f_j + f_l + j - l}{2}$ , which proves the theorem.  $\square$

## B Proof in the Consistency Analysis (Theorem 2 & Theorem 3)

**Theorem 2.** *The minimizer vector  $\mathbf{f}^*$  of  $\mathbb{E}_{Y|\mathbf{X} \sim P} [AL_{\mathbf{f}}^{\text{ord}}(\mathbf{X}, Y)|\mathbf{X} = \mathbf{x}]$  satisfies the loss reflective property, i.e., it complements the absolute error by starting with a negative integer value, then increasing by one until reaching zero, and then incrementally decreases again.*

*Proof.* We start the proof by analyzing the minimizer  $\mathbf{f}^*$  using  $P_y \triangleq P(y|\mathbf{x})$  as follows:

$$\mathbf{f}^* = \underset{\mathbf{f}}{\operatorname{argmin}} \mathbb{E}_{Y|\mathbf{X} \sim P} [AL_{\mathbf{f}}^{\text{ord}}(\mathbf{X}, Y)|\mathbf{X} = \mathbf{x}] \quad (33)$$

$$= \underset{\mathbf{f}}{\operatorname{argmin}} \sum_y P_y \left[ \max_{j, l \in \{1, \dots, |\mathcal{Y}|\}} \frac{f_j + f_l + j - l}{2} - f_y \right] \quad (34)$$

$$= \underset{\mathbf{f}}{\operatorname{argmin}} \left[ \sum_y P_y \max_{j, l \in \{1, \dots, |\mathcal{Y}|\}} \frac{f_j + f_l + j - l}{2} - \sum_y P_y f_y \right] \quad (35)$$

$$= \underset{\mathbf{f}}{\operatorname{argmin}} \left[ \max_{j, l \in \{1, \dots, |\mathcal{Y}|\}} \frac{f_j + f_l + j - l}{2} - \sum_y P_y f_y \right]. \quad (36)$$

In this proof, we employ a constraint to the potential function,  $\max_j f_j(\mathbf{x}) = 0$ , in order to remove redundant solutions, as adding any constant  $c$  to  $\mathbf{f}$  does not change the value of both  $\operatorname{argmax}_j f_j(\mathbf{x})$ , and  $\mathbb{E}_{Y|\mathbf{X} \sim P} [AL_{\mathbf{f}}^{\text{ord}}(\mathbf{X}, Y)|\mathbf{X} = \mathbf{x}]$ :

$$\max_{j, l \in \{1, \dots, |\mathcal{Y}|\}} \frac{f_j + c + f_l + c + j - l}{2} - \sum_y P_y (f_y + c) \quad (37)$$

$$= c + \max_{j,l \in \{1, \dots, |\mathcal{Y}|\}} \frac{f_j + f_l + j - l}{2} - c - \sum_y P_y(f_y) \quad (38)$$

$$= \max_{j,l \in \{1, \dots, |\mathcal{Y}|\}} \frac{f_j + f_l + j - l}{2} - \sum_y P_y(f_y). \quad (39)$$

Let  $j^*$  and  $l^*$  be the solution of  $\operatorname{argmax}_{j,l \in \{1, \dots, |\mathcal{Y}|\}} \frac{f_j + f_l + j - l}{2}$ . We will start from the first case where  $j^* = l^*$ . In this case, the minimization in Eq. (36) can be reduced to  $\operatorname{argmin}_{\mathbf{f}} \left[ \max_{j \in \{1, \dots, |\mathcal{Y}|\}} f_j - \sum_y P_y f_y \right]$ . Since  $j^* = l^*$ , we know that the following inequalities hold:

$$f_{j^*} \geq f_j \quad \forall j \in \{1, \dots, |\mathcal{Y}|\} \quad (40)$$

$$f_{j^*} + j^* \geq f_j + j, \quad \forall j \in \{1, \dots, |\mathcal{Y}|\} \quad (41)$$

$$f_{j^*} - j^* \geq f_j - j, \quad \forall j \in \{1, \dots, |\mathcal{Y}|\}. \quad (42)$$

Therefore, by Eq. (40) and constraint  $\max_j f_j(\mathbf{x}) = 0$ , we have  $f_{j^*} = 0$ . Then by Eq. (41), for any  $i > 0$ ,  $f_{j^*+i} \leq f_{j^*} - i = -i$ ; and also by Eq. (42), for any  $i > 0$ ,  $f_{j^*-i} \leq f_{j^*} - i = -i$ . Since we want to minimize  $f_{j^*} - \sum_y P_y f_y = -\sum_y P_y f_y$ , the optimal solution is to set  $f_{j^*+i} = -i$  and  $f_{j^*-i} = -i$  for any  $i > 0$ . Therefore we get vector  $\mathbf{f}^*$  that satisfies the *loss reflective* property, i.e., it complements the absolute error by starting with a negative integer value, then increasing by one until reaching zero, and then incrementally decreases again.

We next analyze the second case where  $j^* \neq l^*$ . In this case, the following inequalities hold:

$$f_{j^*} + j^* \geq f_{j^*+i} + j^* + i \Leftrightarrow f_{j^*+i} \leq f_{j^*} - i, \quad \forall i \in \{-j^* + 1, \dots, |\mathcal{Y}| - j^*\} \quad (43)$$

$$f_{l^*} - l^* \geq f_{l^*+i} - l^* - i \Leftrightarrow f_{l^*+i} \leq f_{l^*} + i, \quad \forall i \in \{-l^* + 1, \dots, |\mathcal{Y}| - l^*\}. \quad (44)$$

We also know that for any  $m \in \{1, \dots, |\mathcal{Y}|\}$  the following holds:

$$m < l^* \Rightarrow f_m \leq f_{l^*} - (l^* - m) \quad \text{and} \quad f_m \leq f_{j^*} + (j^* - m) \quad (45)$$

$$m > j^* \Rightarrow f_m \leq f_{j^*} - (m - j^*) \quad \text{and} \quad f_m \leq f_{l^*} + (m - l^*) \quad (46)$$

$$l^* < m < j^* \Rightarrow f_m \leq f_{l^*} + (m - l^*) \quad \text{and} \quad f_m \leq f_{j^*} + (j^* - m). \quad (47)$$

The relation between  $f_{j^*}$  and  $f_{l^*}$  in the following also holds:

$$f_{j^*} \leq f_{l^*} + j^* - l^* \quad (48)$$

$$f_{l^*} \leq f_{j^*} + j^* - l^*. \quad (49)$$

Let  $\mathbf{f}^0$  be any potential function which falls into the second case (the solution of  $(j^*, l^*) = \operatorname{argmax}_{j,l \in \{1, \dots, |\mathcal{Y}|\}} \frac{f_j^0 + f_l^0 + j - l}{2}$  satisfies  $j^* \neq l^*$ ) where  $\mathbf{f}^0$  does not satisfy the *loss reflective* property. Let us define  $h(\mathbf{f}) = \frac{f_j^0 + f_l^0 + j - l}{2} - \sum_y P_y f_y$ . We will show that we can construct  $\mathbf{f}^1$  as follows. Starting from  $\mathbf{f}^1 = \mathbf{f}^0$  we increase all the values of  $f_m^1$  for  $m \in \{1, \dots, |\mathcal{Y}|\} \setminus \{l^*, j^*\}$  such that it satisfies the constraints above with equality for the one that has minimum value. For example, in a 7-class ordinal regression where  $l^* = 2$  and  $j^* = 6$ , one of possible value for  $\mathbf{f}^0$  is  $[-3, -1.4, -0.8, -0.2, -0.7, 0, -1.2]^T$  which satisfies all the constraints above. In this case  $\mathbf{f}^1$  will be  $[-2.4, -1.4, -0.4, 0.6, 1, 0, -1]^T$ . Since the value of  $\frac{f_{j^*} + f_{l^*} + j^* - l^*}{2}$  remains the same and the value of  $\sum_y P_y f_y$  is increasing, we know that  $h(\mathbf{f}^1) < h(\mathbf{f}^0)$ . We know that in  $\mathbf{f}^1$ ,  $f_j - f_{j-1}$  is equal to 1 or -1, except for a pair  $(a, b)$ , where  $l^* \leq a < b \leq j^*$ . In the example above  $a = 4, b = 5, f_a^1 = 0.6$ , and  $f_b^1 = 1$ . We also know that  $\frac{f_{j^*}^1 + f_{l^*}^1 + j^* - l^*}{2} = \frac{f_a^1 + f_b^1 + 1}{2}$ .

We now construct  $\mathbf{f}^2$  from  $\mathbf{f}^1$  as follows. If  $\sum_{y=1}^a P_y \leq 0.5$ , we set  $f_j^2 = f_j^1 - (f_a^1 - f_b^1 + 1)$  for  $j \in \{1, \dots, a\}$  and set  $f_j^2 = f_j^1$  for  $j \in \{b, \dots, |\mathcal{Y}|\}$ ; otherwise we set  $f_j^2 = f_j^1$  for  $j \in \{1, \dots, a\}$  and set  $f_j^2 = f_j^1 - (f_b^1 - f_a^1 + 1)$  for  $j \in \{b, \dots, |\mathcal{Y}|\}$ . For the example above, if  $\sum_{y=1}^a P_y \leq 0.5$  then  $\mathbf{f}^2 = [-3, -2, -1, 0, 1, 0, -1]$ , otherwise  $\mathbf{f}^2 = [-2.4, -1.4, -0.4, 0.6, -0.4, -1.4, -2.4]$ . We claim that  $h(\mathbf{f}^2) \leq h(\mathbf{f}^1)$  as shown for the case that  $\sum_{y=1}^a P_y \leq 0.5$  (the other case follows in a similar way):

$$h(\mathbf{f}^2) = \max_{j,l \in \{1, \dots, |\mathcal{Y}|\}} \frac{f_j^2 + f_l^2 + j - l}{2} - \sum_y P_y f_y^2 = f_b^2 - \sum_y P_y f_y^2 \quad (50)$$

$$= f_b^2 - \sum_{y=1}^a P_y f_y^2 - \sum_{y=b}^{|\mathcal{Y}|} P_y f_y^2 \quad (51)$$

$$= f_b^1 - \sum_{y=1}^a P_y [f_y^1 - (f_a^1 - f_b^1 + 1)] - \sum_{y=b}^{|\mathcal{Y}|} P_y f_y^1 \quad (52)$$

$$= f_b^1 + \sum_{y=1}^a P_y [f_a^1 - f_b^1 + 1] - \sum_y P_y f_y^1 \quad (53)$$

$$\leq f_b^1 + 0.5 [f_a^1 - f_b^1 + 1] - \sum_y P_y f_y^1 = \frac{f_a^1 + f_b^1 + 1}{2} - \sum_y P_y f_y^1 = h(\mathbf{f}^1). \quad (54)$$

Finally, we construct  $\mathbf{f}^3 = \mathbf{f}^2 - \max_j f_j^2$ . Since adding a constant to any  $\mathbf{f}$  does not change the value of  $h(\mathbf{f})$ , we know that  $h(\mathbf{f}^3) = h(\mathbf{f}^2)$ . We also know that  $\mathbf{f}^3$  satisfies the *loss reflective* property described above. As an example, in the case  $\sum_{y=1}^a P_y \leq 0.5$ , then  $\mathbf{f}^3 = [-4, -3, -2, -1, 0, -1, -2]$ .

Since for any  $\mathbf{f}^0$  that falls into the second case where the solution for  $(j^*, l^*) = \arg\max_{j, l \in \{1, \dots, |\mathcal{Y}|\}} \frac{f_j^0 + f_l^0 + j - l}{2}$  satisfies  $j^* \neq l^*$  and  $\mathbf{f}^0$  does not satisfy the *loss reflective* property, we can construct  $\mathbf{f}^3$  which satisfies the *loss reflective* property and having the value of  $h(\mathbf{f}^3) < h(\mathbf{f}^0)$ , then  $\mathbf{f}^0$  cannot be the minimizer. Therefore, we can conclude that in the first and second cases, the minimizer has to satisfy the *loss reflective* property which complete the proof of the theorem.  $\square$

**Theorem 3.** *The adversarial ordinal regression surrogate loss  $AL^{\text{ord}}$  from Eq. (5) is Fisher consistent.*

*Proof.* We denote  $h(\mathbf{f}) \triangleq \mathbb{E}_{Y|\mathbf{X} \sim P} [AL_{\mathbf{f}}^{\text{ord}}(\mathbf{X}, Y) | \mathbf{X} = \mathbf{x}]$ . Based on Theorem 2, the minimization  $\arg\min h(\mathbf{f})$  reduces to the minimization over the set that contains all  $\mathbf{f}$  that satisfies the *loss reflective* property and  $\max_j f_j = 0$ . Note that the set contains only  $|\mathcal{Y}|$  items. In the case of  $\arg\max_j f_j = j^*$ , we know that  $\mathbf{f}$  that satisfies the *loss reflective* property has values  $f_j = -|j^* - j|$ , and hence:

$$\begin{aligned} h(\mathbf{f}) &= \sum_y P_y \left[ \max_{j, l \in \{1, \dots, |\mathcal{Y}|\}} \frac{f_j + f_l + j - l}{2} - f_y \right] = \sum_y P_y [f_{j^*} - f_y] = f_{j^*} - \sum_{y=1}^{|\mathcal{Y}|} P_y f_y \quad (55) \\ &= - \sum_{y=1}^{|\mathcal{Y}|} P_y f_y = - \sum_{y=1}^{|\mathcal{Y}|} P_y (-|j^* - y|) = \sum_{y=1}^{|\mathcal{Y}|} P_y |j^* - y|. \end{aligned}$$

Therefore, the minimizer  $\mathbf{f}^* = \arg\min h(\mathbf{f})$  satisfies  $\arg\max_j f_j^*(\mathbf{x}) \subseteq \arg\min_j \sum_y P_y |j - y|$  and implies Fisher consistency.  $\square$

## C Primal Optimization in Details

To optimize the regularized adversarial ordinal regression loss in the primal, we employ stochastic average gradient (SAG) methods [37, 38]. SAG has been shown to converge faster than standard stochastic gradient optimization [37, 38]. In this section, we focus on the adversarial adversarial ordinal regression with multiclass representation ( $AL_{\mathbf{w}}^{\text{ord-mc}}$ ). A version for the thresholded regression representation follows in a similar way.

Given the regularization constant  $\lambda$  and the learning rate  $\alpha$ , the standard batch gradient update for risk minimization can be written as:

$$\mathbf{w}^{t+1} = \mathbf{w}^t - \alpha \left[ \frac{1}{n} \sum_{i=1}^n \mathbf{g}_i^t + \lambda \mathbf{w}^t \right] = (1 - \alpha\lambda) \mathbf{w}^t - \frac{\alpha}{n} \sum_{i=1}^n \mathbf{g}_i^t, \quad (56)$$

where  $\mathbf{g}_i$  is the loss gradient with respect to  $i$ -th example. The idea of SAG is to use the gradient of each example from the last iteration where it was selected to take a step. However, the naïve implementation of SAG requires storing the gradient of each sample, which may be expensive in terms of the memory requirements.

---

**Algorithm 1** SAG for adversarial ordinal regression with multiclass representation

---

```

1: Input: training dataset with pairs  $\{\mathbf{x}_i, y_i\}$ , learning rate  $\alpha$ , regularization constant  $\lambda$ 
2:  $m \leftarrow 0$  {the number of sampled pairs so far}
3:  $\mathbf{d} \leftarrow \mathbf{0}$  {for storing  $\sum_{i=1}^m \mathbf{g}_i$ }
4:  $j_i \leftarrow 0, l_i \leftarrow 0$  for  $i = 1, 2, \dots, n$ 
5: repeat
6:   Sample  $i$  from  $\{1, \dots, n\}$ 
7:    $j^*, l^* \leftarrow \operatorname{argmax}_{j, l} \frac{\mathbf{w}_j \cdot \mathbf{x}_i + \mathbf{w}_l \cdot \mathbf{x}_i + j - l}{2} - \mathbf{w}_{y_i} \cdot \mathbf{x}_i$ 
8:   if it is the first time we sample  $i$  then
9:      $m \leftarrow m + 1$ 
10:     $\mathbf{d}_{j^*} \leftarrow \mathbf{d}_{j^*} + \frac{1}{2} \mathbf{x}_i, \mathbf{d}_{l^*} \leftarrow \mathbf{d}_{l^*} + \frac{1}{2} \mathbf{x}_i$ 
11:     $\mathbf{d}_{y_i} \leftarrow \mathbf{d}_{y_i} - \mathbf{x}_i$ 
12:   else
13:     $\mathbf{d}_{j_i} \leftarrow \mathbf{d}_{j_i} - \frac{1}{2} \mathbf{x}_i, \mathbf{d}_{l_i} \leftarrow \mathbf{d}_{l_i} - \frac{1}{2} \mathbf{x}_i$ 
14:     $\mathbf{d}_{j^*} \leftarrow \mathbf{d}_{j^*} + \frac{1}{2} \mathbf{x}_i, \mathbf{d}_{l^*} \leftarrow \mathbf{d}_{l^*} + \frac{1}{2} \mathbf{x}_i$ 
15:   end if
16:    $j_i \leftarrow j^*, l_i \leftarrow l^*$ 
17:    $\mathbf{w} \leftarrow (1 - \alpha\lambda)\mathbf{w} - \frac{\alpha}{m} \mathbf{d}$ 
18: until converge

```

---

Fortunately, for  $\text{AL}_{\mathbf{w}}^{\text{ord-mc}}$ , we can drastically reduce this memory requirement by not directly storing the gradient using the following technique. Let  $j^*, l^* = \operatorname{argmax}_{j, l} \frac{\mathbf{w}_j \cdot \mathbf{x}_i + \mathbf{w}_l \cdot \mathbf{x}_i + j - l}{2} - \mathbf{w}_{y_i} \cdot \mathbf{x}_i$ . Assuming that  $j^* \neq l^* \neq y_i$ , we know that the sub-gradients are:  $\nabla_{\mathbf{w}_{j^*}} = \frac{1}{2} \mathbf{x}_i$ ,  $\nabla_{\mathbf{w}_{l^*}} = \frac{1}{2} \mathbf{x}_i$ , and  $\nabla_{\mathbf{w}_{y_i}} = -\mathbf{x}_i$ , while  $\nabla_{\mathbf{w}_k} = \mathbf{0}$  for  $k \in \{1, \dots, |\mathcal{Y}|\} \setminus \{j^*, l^*, y_i\}$ . Therefore, instead of storing the sub-gradient, we can just store  $j^*$  and  $l^*$ . Let us denote  $j_i$  and  $l_i$  for  $i = 1, 2, \dots, n$  as the storage for each example's last  $j^*$  and  $l^*$ . We also construct a vector  $\mathbf{d}$  which has the same length as our parameter vector  $\mathbf{w}$  to store the sum of the latest gradients, i.e.  $\mathbf{d} = \sum_{i=1}^m \mathbf{g}_i$ , where  $m$  is the number of training pairs  $\{\mathbf{x}_i, y_i\}$  sampled so far. Using this notation, Algorithm 1 describes this technique for implementing SAG for adversarial ordinal regression loss with multiclass representation.

## D Dual Optimization in Details

Based on Equation 5, the primal optimization of regularized adversarial ordinal regression loss can be written as:

$$\begin{aligned}
& \min_{\mathbf{w}} \frac{1}{2} \|\mathbf{w}\|^2 + C \sum_{i=1}^n \left[ \max_{j \in \{1, \dots, |\mathcal{Y}|\}} \frac{\mathbf{w} \cdot \phi(\mathbf{x}_i, j) + j}{2} + \max_{j \in \{1, \dots, |\mathcal{Y}|\}} \frac{\mathbf{w} \cdot \phi(\mathbf{x}_i, j) - j}{2} - \mathbf{w} \cdot \phi(\mathbf{x}_i, y_i) \right] \\
& \quad (57) \\
& = \min_{\mathbf{w}} \frac{1}{2} \|\mathbf{w}\|^2 + \frac{C}{2} \sum_{i=1}^n \max_{j \in \{1, \dots, |\mathcal{Y}|\}} (\mathbf{w} \cdot \phi(\mathbf{x}_i, j) - \mathbf{w} \cdot \phi(\mathbf{x}_i, y_i) + j) \\
& \quad (58) \\
& \quad + \frac{C}{2} \sum_{i=1}^n \max_{j \in \{1, \dots, |\mathcal{Y}|\}} (\mathbf{w} \cdot \phi(\mathbf{x}_i, j) - \mathbf{w} \cdot \phi(\mathbf{x}_i, y_i) - j).
\end{aligned}$$

The optimization above is equivalent with the following constrained optimization:

$$\begin{aligned}
& \min_{\mathbf{w}} \frac{1}{2} \|\mathbf{w}\|^2 + \frac{C}{2} \sum_{i=1}^n \xi_i + \frac{C}{2} \sum_{i=1}^n \delta_i \\
& \text{subject to: } \xi_i \geq \mathbf{w} \cdot \phi(\mathbf{x}_i, j) - \mathbf{w} \cdot \phi(\mathbf{x}_i, y_i) + j \quad \forall i \in \{1, \dots, n\}; j \in \{1, \dots, |\mathcal{Y}|\} \\
& \quad \delta_i \geq \mathbf{w} \cdot \phi(\mathbf{x}_i, j) - \mathbf{w} \cdot \phi(\mathbf{x}_i, y_i) - j \quad \forall i \in \{1, \dots, n\}; j \in \{1, \dots, |\mathcal{Y}|\}.
\end{aligned} \tag{59}$$

The Lagrangian for the optimization above is:

$$\begin{aligned} \mathcal{L} = & \frac{1}{2} \|\mathbf{w}\|^2 + \frac{C}{2} \sum_{i=1}^n \xi_i + \frac{C}{2} \sum_{i=1}^n \delta_i - \sum_{i=1}^n \sum_{j=1}^{|\mathcal{Y}|} \alpha_{i,j} [\xi_i - \mathbf{w} \cdot \phi(\mathbf{x}_i, j) + \mathbf{w} \cdot \phi(\mathbf{x}_i, y_i) - j] \\ & - \sum_{i=1}^n \sum_{j=1}^{|\mathcal{Y}|} \beta_{i,j} [\delta_i - \mathbf{w} \cdot \phi(\mathbf{x}_i, j) + \mathbf{w} \cdot \phi(\mathbf{x}_i, y_i) + j]. \end{aligned} \quad (60)$$

The KKT conditions:

$$\begin{aligned} \nabla_{\mathbf{w}} \mathcal{L} &= \mathbf{w} - \sum_{i=1}^n \sum_{j=1}^{|\mathcal{Y}|} \alpha_{i,j} [-\phi(\mathbf{x}_i, j) + \phi(\mathbf{x}_i, y_i)] - \sum_{i=1}^n \sum_{j=1}^{|\mathcal{Y}|} \beta_{i,j} [-\phi(\mathbf{x}_i, j) + \phi(\mathbf{x}_i, y_i)] = 0 \\ \implies \mathbf{w} &= \sum_{i=1}^n \sum_{j=1}^{|\mathcal{Y}|} (\alpha_{i,j} + \beta_{i,j}) [\phi(\mathbf{x}_i, y_i) - \phi(\mathbf{x}_i, j)] \\ \nabla_{\xi_i} \mathcal{L} &= \frac{C}{2} - \sum_{j=1}^{|\mathcal{Y}|} \alpha_{i,j} = 0 \implies \sum_{j=1}^{|\mathcal{Y}|} \alpha_{i,j} = \frac{C}{2} \\ \nabla_{\delta_i} \mathcal{L} &= \frac{C}{2} - \sum_{j=1}^{|\mathcal{Y}|} \beta_{i,j} = 0 \implies \sum_{j=1}^{|\mathcal{Y}|} \beta_{i,j} = \frac{C}{2} \\ \forall i, j, \alpha_{i,j} [\xi_i - \mathbf{w} \cdot \phi(\mathbf{x}_i, j) + \mathbf{w} \cdot \phi(\mathbf{x}_i, y_i) - j] &= 0 \\ \implies \alpha_{i,j} &= 0 \vee \xi_i = \mathbf{w} \cdot \phi(\mathbf{x}_i, j) - \mathbf{w} \cdot \phi(\mathbf{x}_i, y_i) + j \\ \forall i, j, \beta_{i,j} [\delta_i - \mathbf{w} \cdot \phi(\mathbf{x}_i, j) + \mathbf{w} \cdot \phi(\mathbf{x}_i, y_i) + j] &= 0 \\ \implies \beta_{i,j} &= 0 \vee \delta_i = \mathbf{w} \cdot \phi(\mathbf{x}_i, j) - \mathbf{w} \cdot \phi(\mathbf{x}_i, y_i) - j. \end{aligned}$$

Rearranging the Lagrangian formula and then plugging the definition of  $\mathbf{w}$  in terms of the dual variables and applying the constraints yields:

$$\begin{aligned} \mathcal{L} &= \sum_{i=1}^n \sum_{j=1}^{|\mathcal{Y}|} j (\alpha_{i,j} - \beta_{i,j}) \\ &\quad - \frac{1}{2} \sum_{i,k=1}^n \sum_{j,l=1}^{|\mathcal{Y}|} (\alpha_{i,j} + \beta_{i,j}) (\alpha_{k,l} + \beta_{k,l}) (\phi(\mathbf{x}_i, j) - \phi(\mathbf{x}_i, y_i)) \cdot (\phi(\mathbf{x}_k, l) - \phi(\mathbf{x}_k, y_k)). \end{aligned} \quad (61)$$

Therefore, the dual optimization can be written as:

$$\begin{aligned} \max_{\alpha, \beta} \quad & \sum_{i,j} j (\alpha_{i,j} - \beta_{i,j}) \\ & - \frac{1}{2} \sum_{i,j,k,l} (\alpha_{i,j} + \beta_{i,j}) (\alpha_{k,l} + \beta_{k,l}) (\phi(\mathbf{x}_i, j) - \phi(\mathbf{x}_i, y_i)) \cdot (\phi(\mathbf{x}_k, l) - \phi(\mathbf{x}_k, y_k)) \\ \text{subject to: } & \alpha_{i,j} \geq 0; \beta_{i,j} \geq 0; \sum_j \alpha_{i,j} = \frac{C}{2}; \sum_j \beta_{i,j} = \frac{C}{2}; i, k \in \{1, \dots, n\}; j, l \in \{1, \dots, |\mathcal{Y}|\}. \end{aligned} \quad (62)$$
